# Supplementary material for: Quantitative reconstruction of past monsoon precipitation based on tetraether membrane lipids in Chinese loess
Source: Copernicus journal article supplement (doi:10.5194/egusphere-2024-1648), 2024-06-14
Supplement: Supplementary file 1 [file egusphere-2024-1648-supplement.pdf]

1 **Quantitative reconstruction of past monsoon precipitation**  
2 **based on tetraether membrane lipids in Chinese loess**

3 Jingjing Guo<sup>1</sup>, Martin Ziegler<sup>1</sup>, Louise Fuchs<sup>1</sup>, Youbin Sun<sup>2</sup>, Francien Peterse<sup>1</sup>

4 <sup>1</sup>Department of Earth Sciences, Utrecht University, 3584 CB Utrecht, the Netherlands

5 <sup>2</sup>State key laboratory of Loess and Quaternary Geology, Institute of Earth Environment, Chinese Academy of  
6 Sciences, Xi'an, 710061, China

7 *Correspondence to:* Jingjing Guo (j.guo@uu.nl)

8 Supplementary figures

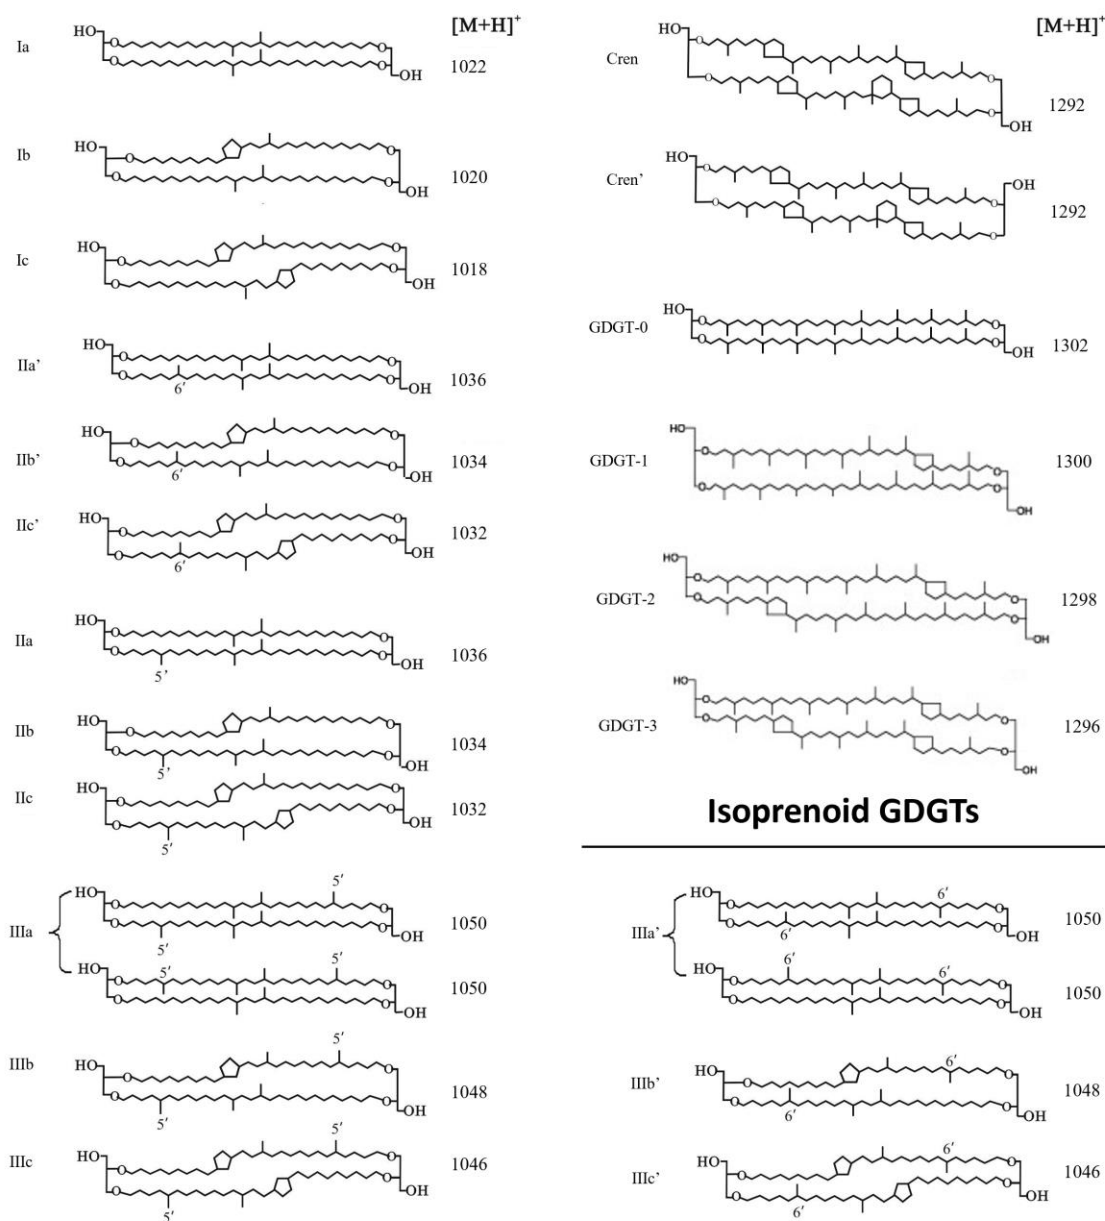

### Branched GDGTs

9

10 **Figure S1.** Structures of branched (left and bottom right) and isoprenoid (top right) GDGTs.  
 11 The 6-methyl brGDGTs are represented by prime ('). The structures of penta- and  
 12 hexamethylated brGDGTs with cyclopentane moiety(ies) IIb', IIc', IIIb', IIIc' are tentative.

13

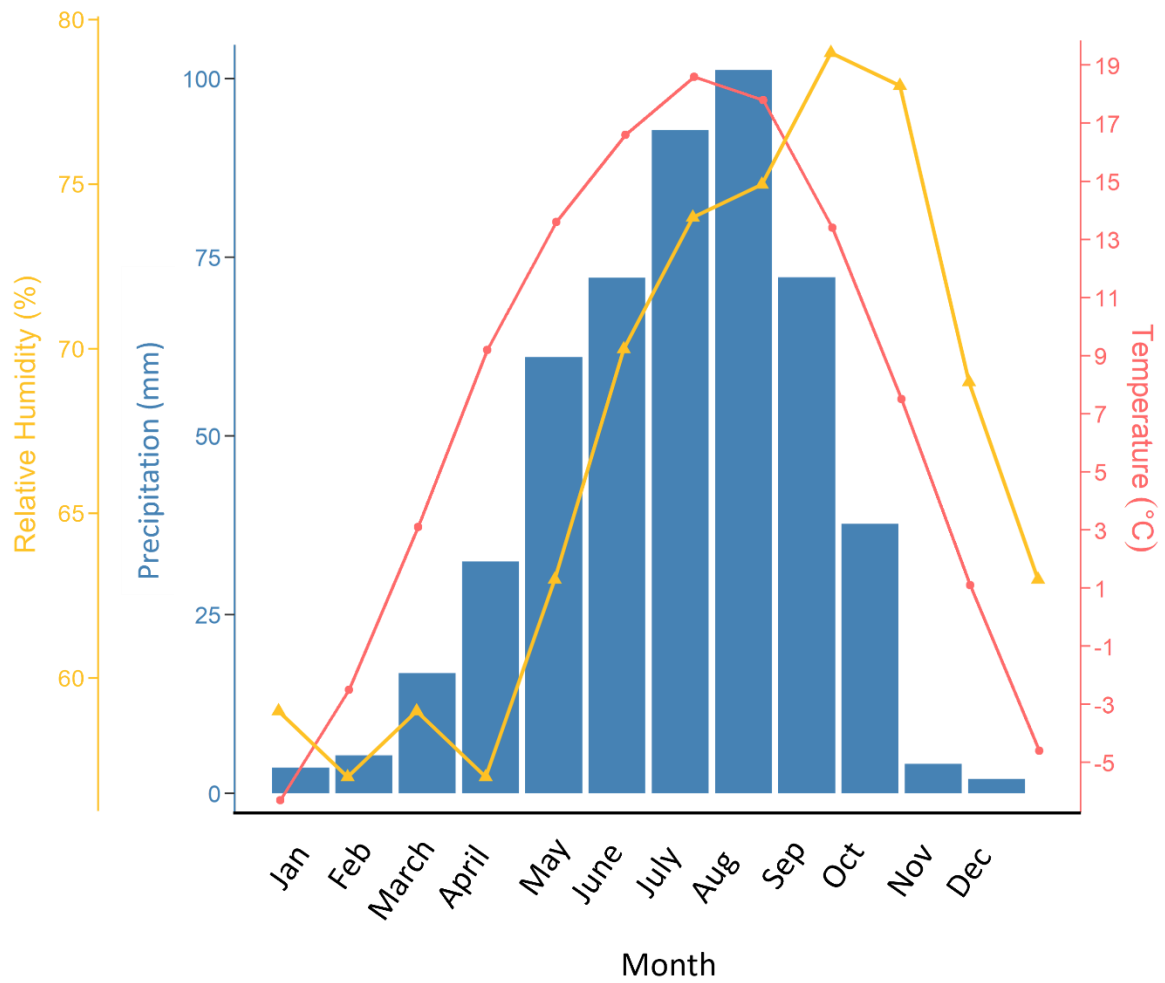

14

15 **Figure S2.** Monthly air temperature, precipitation, and relative humidity (RH) at Linxia city  
 16 between 1999–2017, close to the Yuanbao section on the CLP. Data obtained from the China  
 17 Meteorological Data Service Center, <http://data.cma.cn/en>.

18

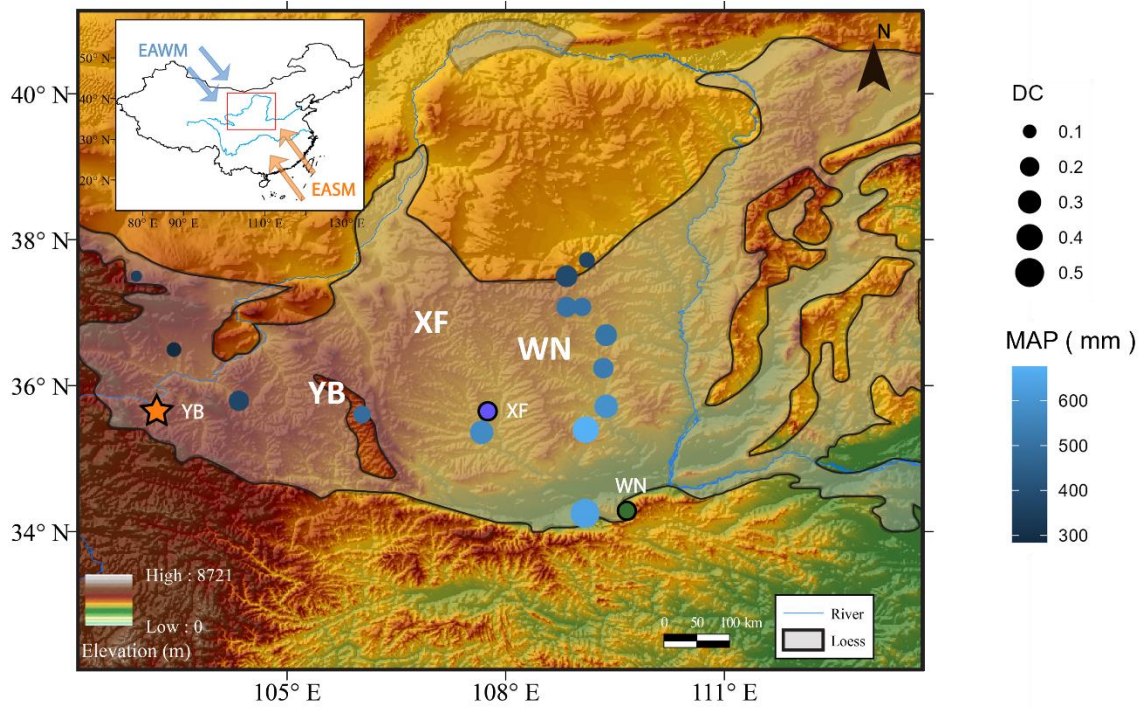

20

21 **Figure S3.** Locations of surface soils from the Chinese Loess Plateau used for Mean Annual  
22 Precipitation (MAP) calibration. The blue gradient and different sizes represent changes in  
23 MAP and DC, respectively. The orange star indicates the section for this study, Yuanbao  
24 (YB). Loess-paleosol sequences mentioned in the text are also indicated (Weinan, WN in  
25 green circle, and Xifeng, XF in purple circle).

26

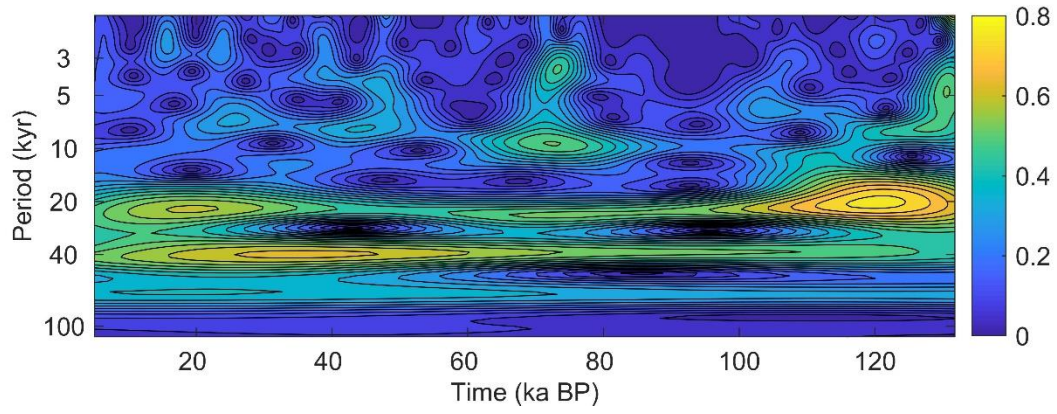

27

28 **Figure S4.** Wavelet power spectrum of degree of cyclization (DC) of brGDGTs from  
29 Yuanbao. Color shadings indicate the power of the correlation.

30
